# Supplementary material for: Nanoscale imaging of Bacillus thuringiensis flagella using atomic force microscopy
Source: Royal Society of Chemistry journal article supplement (doi:10.1039/c1nr11161b), 2011-12-13
Supplement: c1nr11161b.pdf [file c1nr11161b.pdf]

## Supplementary Information

### Nanoscale imaging of *Bacillus thuringiensis* flagella using atomic force microscopy

Annika Gillis, Vincent Dupres, Guillaume Delestrait, Jacques Mahillon  
and Yves F. Dufrêne

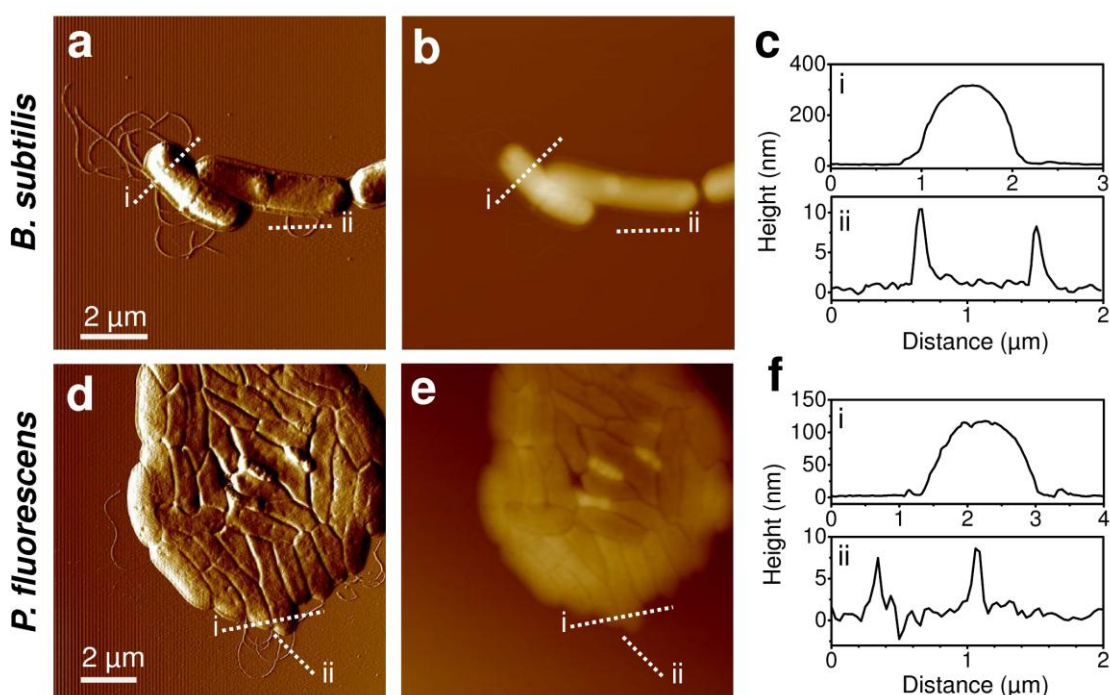

**Supplementary Fig. 1. AFM imaging in air of other Gram-positive and Gram-negative species. (a, d)** Deflection and **(b, e)** height images recorded in air for *B. subtilis* (**a, b**) and **(d, e)** *P. fluorescens* strains. **(c, f)** Vertical cross-sections taken in the height images along the dashed lines, emphasizing i) the cell body, and ii) the flagella (highlighted by arrows).
